# Supplementary material
Source: Springer Nature journal article supplement (https://www.springermedizin.de/resource/supplementary/12893_2011_234_MOESM4_ESM.doc/9511932)
Supplement: MOESM4 [file 9511932]

Table 2. Preoperative data

| - Age - ASA-classification - Co-morbidity (see Table 1) - Medication - Smoking habit - Body Mass Index (BMI) - Visual Analogue Scale (VAS) to evaluate pain associated with the inguinal hernia - Duration of (hernia associated) symptoms in months |
| --- |
